# Supplementary material for: A Simple Method for Analyzing Exome Sequencing Data Shows Distinct Levels of Nonsynonymous Variation for Human Immune and Nervous System Genes
Source: PubMed Central journal article supplement (PMC3368947; doi:10.1371/journal.pone.0038087), 2012-06-06

## A) Expression-based candidates

*Nonsynonymous and Synonymous Sites for Candidate Genes*

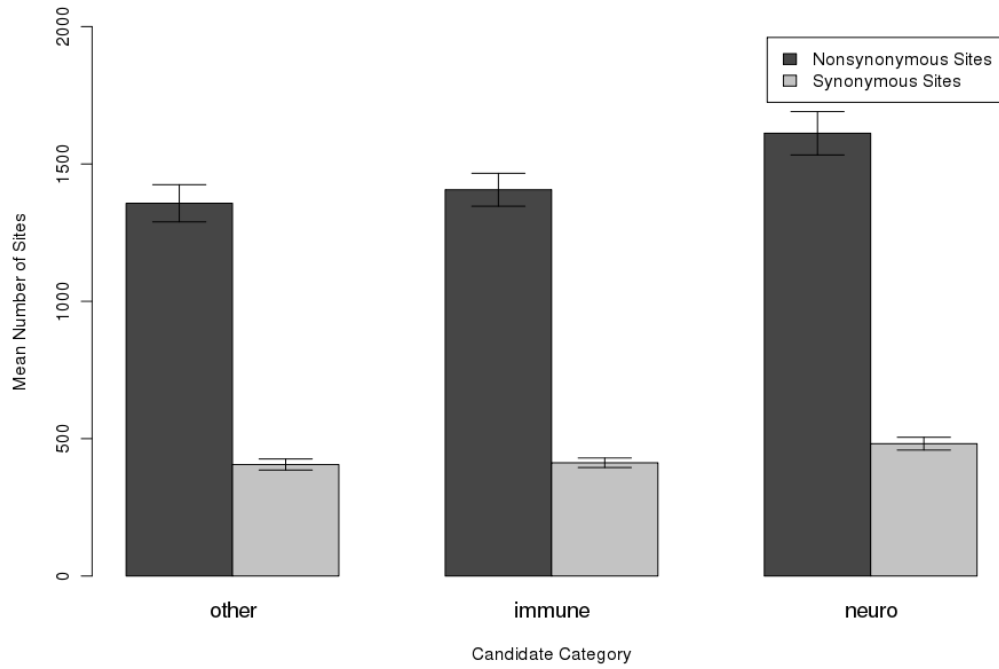

## B) Keyword-based candidates

*Nonsynonymous and Synonymous Sites for Candidate Genes*

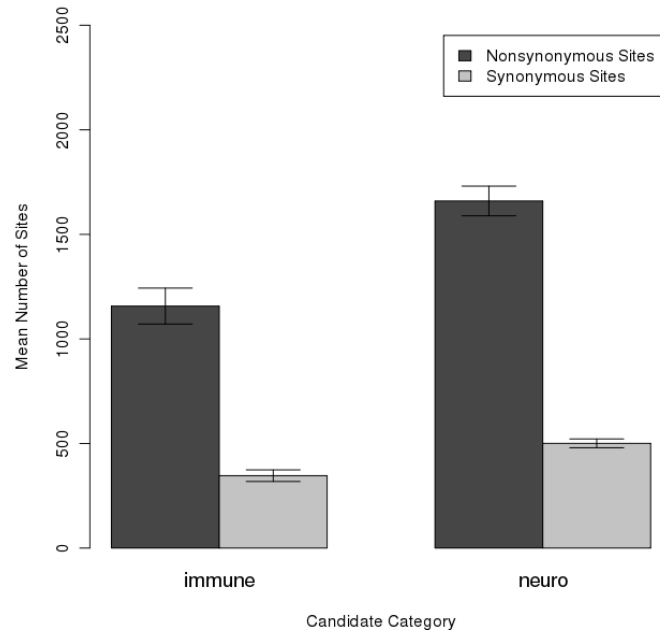

Supplement: pone.0038087.s001.pdf [file pone.0038087.s001.pdf]
