# Supplementary material for: A Simple Method for Analyzing Exome Sequencing Data Shows Distinct Levels of Nonsynonymous Variation for Human Immune and Nervous System Genes
Source: PubMed Central journal article supplement (PMC3368947; doi:10.1371/journal.pone.0038087), 2012-06-06

### Disease Gene Loci Recorded in OMIM and the GWAS catalog

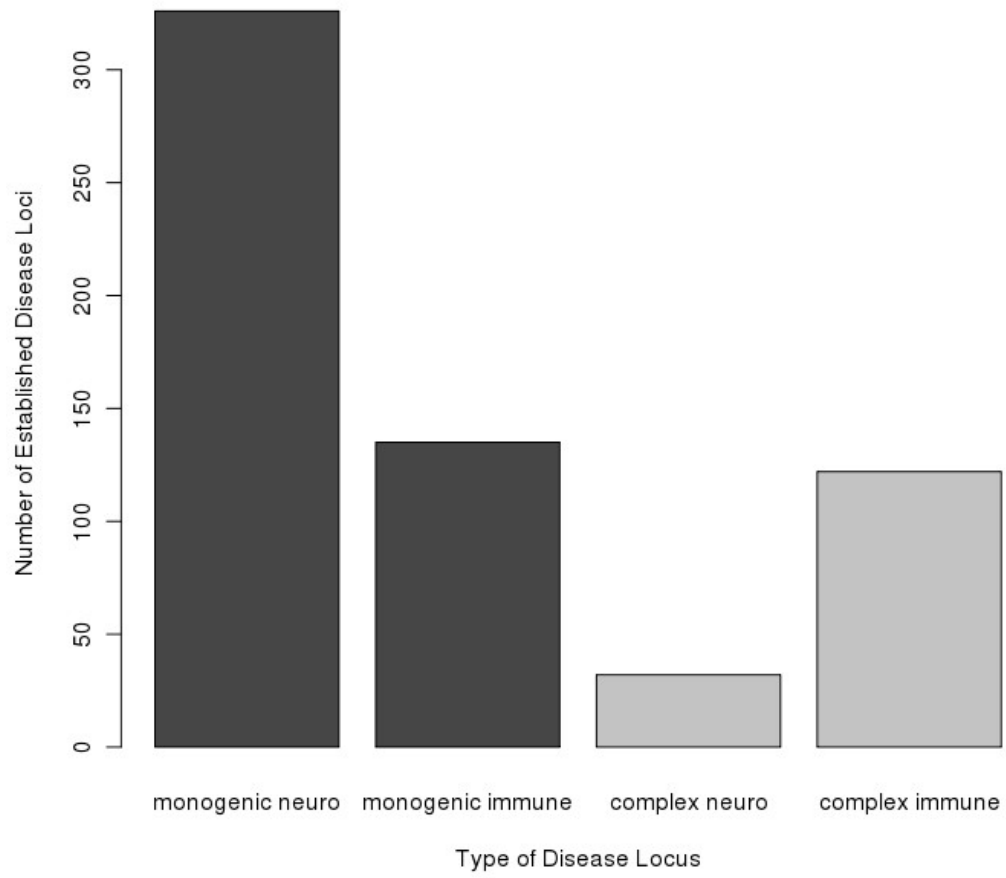

Supplement: pone.0038087.s002.pdf [file pone.0038087.s002.pdf]
