# Supplementary material for: A Simple Method for Analyzing Exome Sequencing Data Shows Distinct Levels of Nonsynonymous Variation for Human Immune and Nervous System Genes
Source: PubMed Central journal article supplement (PMC3368947; doi:10.1371/journal.pone.0038087), 2012-06-06
Supplement: pone.0038087.s003.pdf [file pone.0038087.s003.pdf]

**Number of synonymous and nonsynonymous sites in the human reference sequence.**

| <b>candidate status</b>     | $sSite / 10E03$ | $sSite_{ts} / sSite_{tv}$ | $sSite_{ts} / sSite$ | $nsSite / 10E03$ | $nsSite_{ts} / nsSite_{tv}$ | $nsSite_{ts} / nsSite$ |
|-----------------------------|-----------------|---------------------------|----------------------|------------------|-----------------------------|------------------------|
| <b>RSG</b>                  | 608.7           | 0.982                     | 0.495                | 2035.4           | 0.398                       | 0.285                  |
| <b>expression-based ISG</b> | 616.7           | 1                         | 0.5                  | 2103.5           | 0.395                       | 0.283                  |
| <b>expression-based NSG</b> | 720.6           | 0.98                      | 0.495                | 2411.1           | 0.398                       | 0.285                  |
| <b>keyword-based ISG</b>    | 359.9           | 0.98                      | 0.495                | 1203.3           | 0.399                       | 0.285                  |
| <b>keyword-based NSG</b>    | 762.5           | 0.978                     | 0.494                | 2527.9           | 0.4                         | 0.286                  |
