# Supplementary material for: A Simple Method for Analyzing Exome Sequencing Data Shows Distinct Levels of Nonsynonymous Variation for Human Immune and Nervous System Genes
Source: PubMed Central journal article supplement (PMC3368947; doi:10.1371/journal.pone.0038087), 2012-06-06
Supplement: pone.0038087.s004.pdf [file pone.0038087.s004.pdf]

| <b>A) coding SNVs from the diploid genome in expression-based candidates</b> |                     |                      |                                  |       |                     |                                  |         |                   |
|------------------------------------------------------------------------------|---------------------|----------------------|----------------------------------|-------|---------------------|----------------------------------|---------|-------------------|
| candidate status                                                             | nsSNVs (miss, nons) | Rn / 10E-03          | comparison to NSG by permutation | sSNVs | Rs / 10E-03         | comparison to NSG by permutation | Rn / Rs | comparison to NSG |
| RSG                                                                          | 743 (737,6)         | 0.365<br>[0.30-0.38] | P < 1E-5                         | 800   | 1.31<br>[1.19-1.41] | P= 0.08418                       | 0.278   | P < 1E-05         |
| ISG                                                                          | 571 (568,3)         | 0.271                | P < 1E-5                         | 740   | 1.199               | P= 0.78416                       | 0.226   | P= 10E-5          |
| NSG                                                                          | 427 (424,3)         | 0.177                | NA                               | 850   | 1.179               | NA                               | 0.15    | NA                |

| <b>B) coding SNVs from the diploid genome in keyword-based candidates</b> |                     |             |                                  |       |             |                                  |         |                                  |
|---------------------------------------------------------------------------|---------------------|-------------|----------------------------------|-------|-------------|----------------------------------|---------|----------------------------------|
| candidate status                                                          | nsSNVs (miss, nons) | Rn / 10E-03 | comparison to NSG by permutation | sSNVs | Rs / 10E-03 | comparison to NSG by permutation | Rn / Rs | comparison to NSG by permutation |
| ISG                                                                       | 578                 | 0.4803      | P < 1E-05                        | 570   | 1.413       | P = 0.02393                      | 0.303   | P < 1E-05                        |
| NSG                                                                       | 571                 | 0.2258      | NA                               | 1078  | 1.583       | NA                               | 0.159   | NA                               |

| <b>C) coding SNVs from the 200 exomes in expression-based candidates</b> |                     |                     |                                  |       |                     |                                  |         |                                  |
|--------------------------------------------------------------------------|---------------------|---------------------|----------------------------------|-------|---------------------|----------------------------------|---------|----------------------------------|
| candidate status                                                         | nsSNVs (miss, nons) | Rn / 10E-03         | comparison to NSG by permutation | sSNVs | Rs / 10E-03         | comparison to NSG by permutation | Rn / Rs | comparison to NSG by permutation |
| RSG                                                                      | 2324 (2290,34)      | 1.14<br>[1.03-1.19] | P < 1E-05                        | 2204  | 3.62<br>[3.31-3.77] | P = 0.00073                      | 0.31    | P < 1E-05                        |
| ISG                                                                      | 2137 (2112,25)      | 1.01                | P < 1E-05                        | 2133  | 3.458               | P = 0.01389                      | 0.29    | P = 0.00022                      |
| NSG                                                                      | 1807 (1791,16)      | 0.749               | NA                               | 2221  | 3.08                | NA                               | 0.243   | NA                               |

| <b>D) coding SNVs from the 200 exomes in keyword-based candidates</b> |                     |             |                                  |       |             |                                  |         |                                  |
|-----------------------------------------------------------------------|---------------------|-------------|----------------------------------|-------|-------------|----------------------------------|---------|----------------------------------|
| candidate status                                                      | nsSNVs (miss, nons) | Rn / 10E-03 | comparison to NSG by permutation | sSNVs | Rs / 10E-03 | comparison to NSG by permutation | Rn / Rs | comparison to NSG by permutation |
| ISG                                                                   | 1708 (1684/24)      | 1.419       | P < 1 E-05                       | 1462  | 3.89        | P = 0.28535                      | 0.349   | P < 1 E-05                       |
| NSG                                                                   | 2258 (2239/19)      | 0.8932      | NA                               | 2971  | 4.06        | NA                               | 0.229   | NA                               |
