# Supplementary material for: A Simple Method for Analyzing Exome Sequencing Data Shows Distinct Levels of Nonsynonymous Variation for Human Immune and Nervous System Genes
Source: PubMed Central journal article supplement (PMC3368947; doi:10.1371/journal.pone.0038087), 2012-06-06
Supplement: pone.0038087.s005.pdf [file pone.0038087.s005.pdf]

# Sheet1

| GO_Category                                                  | genes | nsSNVs | sSNVs | mean rdnsv | sd rdnsv | rdnsv0 | rdnsv1 |
|--------------------------------------------------------------|-------|--------|-------|------------|----------|--------|--------|
| GO:0007169:transmembrane_receptor_tyrosine_kinase_signaling  | 313   | 365    | 636   | 0.120522   | 0.0113   | 0.385  | 0.072  |
| GO:0007167:enzyme_linked_receptor_protein_signaling_pathway  | 394   | 466    | 771   | 0.127987   | 0.0102   | 0.397  | 0.095  |
| GO:0006935:chemotaxis                                        | 337   | 405    | 669   | 0.136293   | 0.0104   | 0.401  | 0.094  |
| GO:0048812:neuron_projection_morphogenesis                   | 326   | 445    | 703   | 0.13896    | 0.0114   | 0.396  | 0.11   |
| GO:0007409:axonogenesis                                      | 303   | 420    | 664   | 0.141014   | 0.0115   | 0.397  | 0.11   |
| GO:0031175:neuron_projection_development                     | 368   | 510    | 795   | 0.143313   | 0.0109   | 0.4    | 0.119  |
| GO:0048667:cell_morphogenesis_involved_in_neuron_differentia | 322   | 446    | 694   | 0.145977   | 0.0118   | 0.397  | 0.12   |
| GO:0043005:neuron_projection                                 | 411   | 587    | 831   | 0.149634   | 0.0104   | 0.484  | 0.1    |
| GO:0045202:synapse                                           | 326   | 477    | 633   | 0.151173   | 0.0134   | 0.544  | 0.089  |
| GO:0048666:neuron_development                                | 436   | 578    | 890   | 0.152631   | 0.0107   | 0.399  | 0.126  |
| GO:0030182:neuron_differentiation                            | 516   | 667    | 999   | 0.153033   | 0.0098   | 0.423  | 0.127  |
| GO:0000904:cell_morphogenesis_involved_in_differentiation    | 367   | 543    | 791   | 0.155903   | 0.0113   | 0.433  | 0.125  |
| GO:0007268:synaptic_transmission                             | 367   | 456    | 698   | 0.157652   | 0.0121   | 0.399  | 0.155  |
| GO:0048699:generation_of_neurons                             | 664   | 863    | 1266  | 0.161579   | 0.0083   | 0.417  | 0.149  |
| GO:0019226:transmission_of_nerve_impulse                     | 411   | 503    | 759   | 0.163673   | 0.012    | 0.394  | 0.166  |
| GO:0035637:multicellular_organismal_signaling                | 411   | 503    | 759   | 0.163673   | 0.012    | 0.394  | 0.166  |
| GO:0040011:locomotion                                        | 605   | 872    | 1180  | 0.165124   | 0.0091   | 0.483  | 0.125  |
| GO:0030054:cell_junction                                     | 412   | 704    | 876   | 0.166789   | 0.0123   | 0.577  | 0.101  |
| GO:0060589:nucleoside-triphosphatase_regulator_activity      | 325   | 553    | 730   | 0.166863   | 0.0129   | 0.499  | 0.118  |
| GO:0009605:response_to_external_stimulus                     | 703   | 972    | 1288  | 0.167815   | 0.0091   | 0.52   | 0.117  |
| GO:0030695:GTPase_regulator_activity                         | 317   | 552    | 723   | 0.16895    | 0.013    | 0.502  | 0.119  |
| GO:0007267:cell-cell_signaling                               | 568   | 638    | 909   | 0.169132   | 0.011    | 0.443  | 0.147  |
| GO:0022008:neurogenesis                                      | 702   | 948    | 1346  | 0.169413   | 0.0081   | 0.429  | 0.154  |
| GO:0001775:cell_activation                                   | 350   | 482    | 627   | 0.170157   | 0.0131   | 0.51   | 0.125  |
| GO:0016773:phosphotransferase_activity_alcohol_group_as_acc  | 577   | 842    | 1121  | 0.173484   | 0.0112   | 0.467  | 0.139  |
| GO:0009719:response_to_endogenous_stimulus                   | 569   | 692    | 913   | 0.175052   | 0.0116   | 0.471  | 0.144  |
| GO:0051056:regulation_of_small_GTPase_mediated_signal_tran   | 249   | 479    | 609   | 0.176382   | 0.0158   | 0.504  | 0.118  |
| GO:0045859:regulation_of_protein_kinase_activity             | 360   | 471    | 624   | 0.177153   | 0.0139   | 0.499  | 0.133  |
| GO:0016310:phosphorylation                                   | 481   | 588    | 837   | 0.178544   | 0.0128   | 0.392  | 0.156  |
| GO:0048468:cell_development                                  | 737   | 1010   | 1340  | 0.178923   | 0.0098   | 0.466  | 0.14   |
| GO:0030001:metal_ion_transport                               | 323   | 460    | 634   | 0.179418   | 0.014    | 0.484  | 0.134  |
| GO:0031399:regulation_of_protein_modification_process        | 578   | 715    | 918   | 0.18       | 0.0122   | 0.493  | 0.137  |
| GO:0043549:regulation_of_kinase_activity                     | 381   | 515    | 676   | 0.181032   | 0.0141   | 0.497  | 0.139  |
| GO:0001932:regulation_of_protein_phosphorylation             | 466   | 585    | 753   | 0.181724   | 0.0134   | 0.511  | 0.136  |
| GO:0016477:cell_migration                                    | 340   | 499    | 633   | 0.182463   | 0.0146   | 0.504  | 0.154  |
| GO:0004672:protein_kinase_activity                           | 483   | 722    | 949   | 0.183206   | 0.0127   | 0.465  | 0.146  |
| GO:0010646:regulation_of_cell_communication                  | 768   | 957    | 1282  | 0.183792   | 0.0107   | 0.453  | 0.154  |
| GO:0048858:cell_projection_morphogenesis                     | 375   | 595    | 790   | 0.184192   | 0.0118   | 0.448  | 0.161  |
| GO:0032268:regulation_of_cellular_protein_metabolic_process  | 709   | 810    | 1072  | 0.184493   | 0.0111   | 0.452  | 0.146  |
| GO:0051338:regulation_of_transferase_activity                | 390   | 524    | 679   | 0.18504    | 0.0142   | 0.502  | 0.143  |
| GO:0010647:positive_regulation_of_cell_communication         | 379   | 482    | 644   | 0.185201   | 0.0152   | 0.451  | 0.144  |
| GO:0032990:cell_part_morphogenesis                           | 379   | 597    | 791   | 0.18557    | 0.0118   | 0.448  | 0.162  |
| GO:0023056:positive_regulation_of_signaling                  | 381   | 486    | 650   | 0.185964   | 0.0156   | 0.456  | 0.142  |
| GO:0016301:kinase_activity                                   | 652   | 984    | 1249  | 0.186251   | 0.0111   | 0.488  | 0.147  |
| GO:0007399:nervous_system_development                        | 1083  | 1550   | 1988  | 0.186352   | 0.008    | 0.475  | 0.172  |
| GO:0006812:cation_transport                                  | 390   | 564    | 730   | 0.186553   | 0.0135   | 0.507  | 0.147  |
| GO:0003779:actin_binding                                     | 240   | 511    | 593   | 0.186623   | 0.0167   | 0.563  | 0.14   |

## Sheet1

|                                                                |     |      |      |          |        |       |       |
|----------------------------------------------------------------|-----|------|------|----------|--------|-------|-------|
| GO:0007420:brain_development                                   | 312 | 430  | 572  | 0.188126 | 0.0157 | 0.446 | 0.212 |
| GO:0010942:positive_regulation_of_cell_death                   | 363 | 510  | 624  | 0.188133 | 0.0143 | 0.526 | 0.171 |
| GO:0043085:positive_regulation_of_catalytic_activity           | 552 | 703  | 926  | 0.188169 | 0.0129 | 0.462 | 0.151 |
| GO:0008324:cation_transmembrane_transporter_activity           | 418 | 585  | 802  | 0.188688 | 0.0128 | 0.45  | 0.144 |
| GO:0006915:apoptosis                                           | 467 | 587  | 776  | 0.188762 | 0.0137 | 0.449 | 0.146 |
| GO:0070727:cellular_macromolecule_localization                 | 390 | 522  | 630  | 0.189018 | 0.0149 | 0.501 | 0.112 |
| GO:0010604:positive_regulation_of_macromolecule_metabolic_p    | 903 | 998  | 1350 | 0.18929  | 0.0114 | 0.424 | 0.147 |
| GO:0012501:programmed_cell_death                               | 477 | 595  | 788  | 0.189632 | 0.0137 | 0.444 | 0.146 |
| GO:0042325:regulation_of_phosphorylation                       | 497 | 648  | 825  | 0.189865 | 0.0134 | 0.498 | 0.149 |
| GO:0051674:localization_of_cell                                | 376 | 613  | 718  | 0.189947 | 0.0134 | 0.557 | 0.149 |
| GO:0048870:cell_motility                                       | 376 | 613  | 718  | 0.189947 | 0.0134 | 0.557 | 0.149 |
| GO:0019725:cellular_homeostasis                                | 389 | 487  | 636  | 0.189994 | 0.0139 | 0.462 | 0.2   |
| GO:0030030:cell_projection_organization                        | 482 | 776  | 1004 | 0.190529 | 0.0112 | 0.453 | 0.167 |
| GO:0051174:regulation_of_phosphorus_metabolic_process          | 513 | 665  | 842  | 0.190972 | 0.0137 | 0.504 | 0.151 |
| GO:0019220:regulation_of_phosphate_metabolic_process           | 513 | 665  | 842  | 0.190972 | 0.0137 | 0.504 | 0.151 |
| GO:0023057:negative_regulation_of_signaling                    | 329 | 417  | 591  | 0.190974 | 0.015  | 0.409 | 0.163 |
| GO:0072359:circulatory_system_development                      | 392 | 561  | 775  | 0.191049 | 0.0143 | 0.425 | 0.162 |
| GO:0072358:cardiovascular_system_development                   | 392 | 561  | 775  | 0.191049 | 0.0143 | 0.425 | 0.162 |
| GO:0010648:negative_regulation_of_cell_communication           | 329 | 418  | 591  | 0.191081 | 0.015  | 0.412 | 0.163 |
| GO:0006468:protein_phosphorylation                             | 401 | 511  | 716  | 0.1912   | 0.0133 | 0.388 | 0.17  |
| GO:0042995:cell_projection                                     | 749 | 1418 | 1608 | 0.19135  | 0.0089 | 0.602 | 0.144 |
| GO:0010557:positive_regulation_of_macromolecule_biosynthetic   | 643 | 714  | 926  | 0.191482 | 0.014  | 0.453 | 0.152 |
| GO:0044451:nucleoplasm_part                                    | 457 | 456  | 596  | 0.191537 | 0.0165 | 0.477 | 0.161 |
| GO:0043065:positive_regulation_of_apoptosis                    | 353 | 499  | 594  | 0.191548 | 0.0148 | 0.545 | 0.172 |
| GO:0043068:positive_regulation_of_programmed_cell_death        | 354 | 500  | 596  | 0.191668 | 0.0147 | 0.545 | 0.172 |
| GO:0008284:positive_regulation_of_cell_proliferation           | 388 | 427  | 586  | 0.191713 | 0.0168 | 0.412 | 0.134 |
| GO:0034613:cellular_protein_localization                       | 387 | 521  | 621  | 0.191797 | 0.0151 | 0.506 | 0.113 |
| GO:0061024:membrane_organization                               | 316 | 535  | 644  | 0.191893 | 0.0141 | 0.545 | 0.148 |
| GO:0016044:cellular_membrane_organization                      | 315 | 535  | 644  | 0.191893 | 0.0141 | 0.545 | 0.148 |
| GO:0007417:central_nervous_system_development                  | 428 | 591  | 764  | 0.192519 | 0.0133 | 0.468 | 0.194 |
| GO:0016265:death                                               | 566 | 719  | 923  | 0.192707 | 0.0129 | 0.456 | 0.16  |
| GO:0042127:regulation_of_cell_proliferation                    | 686 | 803  | 1068 | 0.193078 | 0.0122 | 0.415 | 0.16  |
| GO:0008219:cell_death                                          | 563 | 719  | 922  | 0.193437 | 0.0129 | 0.455 | 0.163 |
| GO:0031325:positive_regulation_of_cellular_metabolic_process   | 934 | 1041 | 1353 | 0.193644 | 0.0116 | 0.439 | 0.151 |
| GO:0045595:regulation_of_cell_differentiation                  | 553 | 687  | 869  | 0.193818 | 0.0128 | 0.488 | 0.185 |
| GO:0016772:transferase_activity,_transferring_phosphorus-conta | 751 | 1155 | 1398 | 0.194148 | 0.0102 | 0.501 | 0.16  |
| GO:0009967:positive_regulation_of_signal_transduction          | 356 | 468  | 594  | 0.194435 | 0.0163 | 0.48  | 0.15  |
| GO:0007186:G-protein_coupled_receptor_signaling_pathway        | 385 | 508  | 675  | 0.19452  | 0.0142 | 0.456 | 0.141 |
| GO:0000902:cell_morphogenesis                                  | 456 | 741  | 937  | 0.194902 | 0.0112 | 0.476 | 0.167 |
| GO:0015075:ion_transmembrane_transporter_activity              | 547 | 853  | 1114 | 0.195177 | 0.0105 | 0.486 | 0.148 |
| GO:0009725:response_to_hormone_stimulus                        | 475 | 609  | 747  | 0.195188 | 0.014  | 0.493 | 0.171 |
| GO:0009891:positive_regulation_of_biosynthetic_process         | 714 | 796  | 1022 | 0.195661 | 0.013  | 0.453 | 0.155 |
| GO:0035556:intracellular_signal_transduction                   | 933 | 1246 | 1539 | 0.196455 | 0.0093 | 0.509 | 0.154 |
| GO:0005216:ion_channel_activity                                | 313 | 506  | 690  | 0.196637 | 0.0126 | 0.455 | 0.139 |
| GO:0009893:positive_regulation_of_metabolic_process            | 975 | 1108 | 1457 | 0.196734 | 0.0113 | 0.432 | 0.151 |
| GO:0031324:negative_regulation_of_cellular_metabolic_process   | 653 | 670  | 890  | 0.197214 | 0.0137 | 0.403 | 0.169 |
| GO:0048585:negative_regulation_of_response_to_stimulus         | 375 | 483  | 647  | 0.197368 | 0.0146 | 0.451 | 0.173 |
| GO:0031328:positive_regulation_of_cellular_biosynthetic_proces | 706 | 794  | 1012 | 0.197489 | 0.0133 | 0.459 | 0.156 |
| GO:0022891:substrate-specific_transmembrane_transporter_acti   | 632 | 954  | 1241 | 0.197576 | 0.0105 | 0.489 | 0.153 |

## Sheet1

|                                                              |      |      |      |          |        |       |       |
|--------------------------------------------------------------|------|------|------|----------|--------|-------|-------|
| GO:0044092:negative_regulation_of_molecular_function         | 383  | 445  | 584  | 0.19871  | 0.0165 | 0.426 | 0.173 |
| GO:0023051:regulation_of_signaling                           | 1119 | 1584 | 1980 | 0.198962 | 0.0091 | 0.483 | 0.164 |
| GO:0004674:protein_serine/threonine_kinase_activity          | 335  | 503  | 599  | 0.199132 | 0.0147 | 0.525 | 0.161 |
| GO:0051246:regulation_of_protein_metabolic_process           | 795  | 962  | 1216 | 0.199198 | 0.0107 | 0.463 | 0.162 |
| GO:0009966:regulation_of_signal_transduction                 | 960  | 1394 | 1736 | 0.200048 | 0.0098 | 0.488 | 0.16  |
| GO:0022838:substrate-specific_channel_activity               | 321  | 520  | 702  | 0.200089 | 0.0128 | 0.463 | 0.142 |
| GO:0044093:positive_regulation_of_molecular_function         | 649  | 824  | 1033 | 0.200122 | 0.0126 | 0.485 | 0.159 |
| GO:0065008:regulation_of_biological_quality                  | 1392 | 2000 | 2390 | 0.200235 | 0.0076 | 0.511 | 0.181 |
| GO:0019899:enzyme_binding                                    | 588  | 887  | 1023 | 0.200511 | 0.0121 | 0.534 | 0.161 |
| GO:0010605:negative_regulation_of_macromolecule_metabolic_   | 668  | 704  | 919  | 0.200531 | 0.0146 | 0.414 | 0.165 |
| GO:0071822:protein_complex_subunit_organization              | 418  | 529  | 670  | 0.200659 | 0.0169 | 0.467 | 0.175 |
| GO:0009892:negative_regulation_of_metabolic_process          | 713  | 736  | 969  | 0.200827 | 0.0137 | 0.403 | 0.171 |
| GO:0015267:channel_activity                                  | 332  | 533  | 710  | 0.201019 | 0.0128 | 0.474 | 0.141 |
| GO:0022803:passive_transmembrane_transporter_activity        | 332  | 533  | 710  | 0.201019 | 0.0128 | 0.474 | 0.141 |
| GO:0010941:regulation_of_cell_death                          | 762  | 986  | 1184 | 0.201134 | 0.0115 | 0.514 | 0.162 |
| GO:0070271:protein_complex_biogenesis                        | 347  | 504  | 623  | 0.201332 | 0.0171 | 0.488 | 0.175 |
| GO:0006928:cellular_component_movement                       | 532  | 920  | 1050 | 0.201386 | 0.0124 | 0.56  | 0.141 |
| GO:0006793:phosphorus_metabolic_process                      | 577  | 758  | 997  | 0.201441 | 0.0129 | 0.412 | 0.183 |
| GO:0006796:phosphate-containing_compound_metabolic_proces    | 577  | 758  | 997  | 0.201441 | 0.0129 | 0.412 | 0.183 |
| GO:0008092:cytoskeletal_protein_binding                      | 400  | 767  | 857  | 0.201502 | 0.0136 | 0.541 | 0.166 |
| GO:0050878:regulation_of_body_fluid_levels                   | 394  | 524  | 704  | 0.201524 | 0.0145 | 0.429 | 0.197 |
| GO:0005829:cytosol                                           | 1418 | 1788 | 2228 | 0.201573 | 0.0079 | 0.465 | 0.174 |
| GO:0007166:cell_surface_receptor_linked_signaling_pathway    | 1190 | 1659 | 2128 | 0.201971 | 0.0084 | 0.446 | 0.168 |
| GO:0051173:positive_regulation_of_nitrogen_compound_metabo   | 671  | 733  | 938  | 0.201979 | 0.0139 | 0.444 | 0.158 |
| GO:0007010:cytoskeleton_organization                         | 374  | 658  | 757  | 0.202404 | 0.0146 | 0.537 | 0.17  |
| GO:0043067:regulation_of_programmed_cell_death               | 739  | 953  | 1138 | 0.202407 | 0.0116 | 0.519 | 0.165 |
| GO:0006461:protein_complex_assembly                          | 345  | 503  | 621  | 0.202427 | 0.0172 | 0.488 | 0.176 |
| GO:0051254:positive_regulation_of_RNA_metabolic_process      | 594  | 630  | 817  | 0.202828 | 0.0151 | 0.44  | 0.165 |
| GO:0042981:regulation_of_apoptosis                           | 733  | 946  | 1126 | 0.202993 | 0.0117 | 0.52  | 0.165 |
| GO:0045935:positive_regulation_of_nucleobase-containing_comf | 655  | 716  | 917  | 0.203097 | 0.0142 | 0.444 | 0.161 |
| GO:0007599:hemostasis                                        | 334  | 462  | 619  | 0.204117 | 0.015  | 0.413 | 0.21  |
| GO:0051172:negative_regulation_of_nitrogen_compound_metabr   | 487  | 518  | 660  | 0.204261 | 0.0153 | 0.437 | 0.174 |
| GO:0007596:blood_coagulation                                 | 331  | 461  | 615  | 0.204366 | 0.015  | 0.415 | 0.21  |
| GO:0050817:coagulation                                       | 331  | 461  | 615  | 0.204366 | 0.015  | 0.415 | 0.21  |
| GO:0051049:regulation_of_transport                           | 540  | 718  | 889  | 0.204599 | 0.0138 | 0.481 | 0.153 |
| GO:0022892:substrate-specific_transporter_activity           | 742  | 1178 | 1446 | 0.204718 | 0.01   | 0.531 | 0.158 |
| GO:0051094:positive_regulation_of_developmental_process      | 390  | 486  | 590  | 0.204832 | 0.0158 | 0.513 | 0.165 |
| GO:0042060:wound_healing                                     | 408  | 599  | 747  | 0.206088 | 0.0136 | 0.465 | 0.202 |
| GO:0065003:macromolecular_complex_assembly                   | 464  | 632  | 771  | 0.206849 | 0.0153 | 0.476 | 0.167 |
| GO:0032989:cellular_component_morphogenesis                  | 490  | 809  | 985  | 0.206885 | 0.0118 | 0.493 | 0.177 |
| GO:0032879:regulation_of_localization                        | 742  | 1083 | 1305 | 0.207358 | 0.0119 | 0.488 | 0.178 |
| GO:0045934:negative_regulation_of_nucleobase-containing_com  | 482  | 514  | 650  | 0.207878 | 0.0155 | 0.437 | 0.175 |
| GO:0042592:homeostatic_process                               | 646  | 925  | 1076 | 0.208832 | 0.0113 | 0.531 | 0.181 |
| GO:0006357:regulation_of_transcription_from_RNA_polymerase_  | 652  | 658  | 837  | 0.208942 | 0.0149 | 0.452 | 0.169 |
| GO:0046907:intracellular_transport                           | 508  | 691  | 782  | 0.209389 | 0.0131 | 0.531 | 0.14  |
| GO:0048878:chemical_homeostasis                              | 450  | 625  | 759  | 0.209576 | 0.0147 | 0.501 | 0.196 |
| GO:0051253:negative_regulation_of_RNA_metabolic_process      | 450  | 471  | 605  | 0.20991  | 0.0163 | 0.427 | 0.177 |
| GO:2000113:negative_regulation_of_cellular_macromolecule_bio | 483  | 506  | 642  | 0.209948 | 0.0174 | 0.426 | 0.183 |
| GO:0048523:negative_regulation_of_cellular_process           | 1545 | 1956 | 2411 | 0.209978 | 0.0091 | 0.463 | 0.183 |

## Sheet1

|                                                                |      |      |      |          |        |       |       |
|----------------------------------------------------------------|------|------|------|----------|--------|-------|-------|
| GO:0010629:negative_regulation_of_gene_expression              | 483  | 509  | 661  | 0.210373 | 0.0164 | 0.413 | 0.178 |
| GO:0045893:positive_regulation_of_transcription,_DNA-depende   | 566  | 619  | 778  | 0.210427 | 0.016  | 0.449 | 0.17  |
| GO:0022857:transmembrane_transporter_activity                  | 700  | 1099 | 1343 | 0.21087  | 0.0105 | 0.521 | 0.166 |
| GO:0055086:nucleobase-containing_small_molecule_metabolic_     | 397  | 495  | 572  | 0.2109   | 0.0185 | 0.519 | 0.168 |
| GO:0031327:negative_regulation_of_cellular_biosynthetic_proces | 518  | 540  | 685  | 0.210986 | 0.0167 | 0.423 | 0.183 |
| GO:0043933:macromolecular_complex_subunit_organization         | 564  | 709  | 864  | 0.211059 | 0.0153 | 0.467 | 0.177 |
| GO:0000267:cell_fraction                                       | 811  | 1328 | 1538 | 0.211105 | 0.0098 | 0.552 | 0.174 |
| GO:0006811:ion_transport                                       | 591  | 979  | 1205 | 0.211152 | 0.0109 | 0.51  | 0.162 |
| GO:0006996:organelle_organization                              | 1078 | 1604 | 1810 | 0.211289 | 0.0095 | 0.538 | 0.172 |
| GO:0005626:insoluble_fraction                                  | 610  | 1085 | 1246 | 0.211392 | 0.0108 | 0.565 | 0.169 |
| GO:0045892:negative_regulation_of_transcription,_DNA-depende   | 440  | 458  | 592  | 0.212085 | 0.0166 | 0.415 | 0.182 |
| GO:0009890:negative_regulation_of_biosynthetic_process         | 529  | 555  | 696  | 0.212097 | 0.0167 | 0.429 | 0.181 |
| GO:0005654:nucleoplasm                                         | 855  | 971  | 1180 | 0.212153 | 0.0118 | 0.479 | 0.175 |
| GO:0050790:regulation_of_catalytic_activity                    | 866  | 1151 | 1383 | 0.212214 | 0.0118 | 0.493 | 0.17  |
| GO:0031975:envelope                                            | 507  | 639  | 748  | 0.212384 | 0.0168 | 0.479 | 0.176 |
| GO:0051641:cellular_localization                               | 846  | 1266 | 1402 | 0.212522 | 0.0098 | 0.543 | 0.164 |
| GO:0030234:enzyme_regulator_activity                           | 648  | 1002 | 1153 | 0.212706 | 0.0115 | 0.534 | 0.161 |
| GO:0016070:RNA_metabolic_process                               | 822  | 935  | 1055 | 0.212885 | 0.0137 | 0.557 | 0.171 |
| GO:0006464:protein_modification_process                        | 1116 | 1478 | 1779 | 0.212917 | 0.009  | 0.47  | 0.182 |
| GO:0044267:cellular_protein_metabolic_process                  | 1558 | 1965 | 2291 | 0.213473 | 0.008  | 0.497 | 0.18  |
| GO:0050793:regulation_of_developmental_process                 | 787  | 1075 | 1278 | 0.213508 | 0.0109 | 0.503 | 0.202 |
| GO:0065009:regulation_of_molecular_function                    | 1063 | 1375 | 1631 | 0.213999 | 0.0102 | 0.503 | 0.175 |
| GO:0048522:positive_regulation_of_cellular_process             | 1750 | 2222 | 2666 | 0.214074 | 0.0087 | 0.484 | 0.174 |
| GO:0051276:chromosome_organization                             | 380  | 577  | 600  | 0.214198 | 0.0172 | 0.628 | 0.174 |
| GO:0048518:positive_regulation_of_biological_process           | 1927 | 2471 | 2939 | 0.214277 | 0.0083 | 0.49  | 0.183 |
| GO:0010558:negative_regulation_of_macromolecule_biosynthetic   | 503  | 537  | 670  | 0.214311 | 0.0173 | 0.434 | 0.183 |
| GO:0005624:membrane_fraction                                   | 587  | 1067 | 1225 | 0.21492  | 0.011  | 0.56  | 0.174 |
| GO:2000026:regulation_of_multicellular_organismal_developmen   | 617  | 772  | 957  | 0.215249 | 0.0125 | 0.476 | 0.209 |
| GO:0016043:cellular_component_organization                     | 2173 | 3361 | 3861 | 0.215321 | 0.0068 | 0.519 | 0.186 |
| GO:0071842:cellular_component_organization_at_cellular_level   | 1765 | 2680 | 3055 | 0.215434 | 0.0073 | 0.52  | 0.183 |
| GO:0044431:Golgi_apparatus_part                                | 409  | 491  | 596  | 0.215459 | 0.0169 | 0.456 | 0.179 |
| GO:0009057:macromolecule_catabolic_process                     | 377  | 494  | 540  | 0.215998 | 0.0187 | 0.533 | 0.208 |
| GO:0051336:regulation_of_hydrolase_activity                    | 416  | 536  | 675  | 0.216314 | 0.0157 | 0.453 | 0.161 |
| GO:0030554:adenyl_nucleotide_binding                           | 1172 | 2292 | 2444 | 0.216788 | 0.0085 | 0.602 | 0.172 |
| GO:0032559:adenyl_ribonucleotide_binding                       | 1165 | 2290 | 2439 | 0.21689  | 0.0085 | 0.603 | 0.171 |
| GO:0016023:cytoplasmic_membrane-bounded_vesicle                | 498  | 786  | 898  | 0.216929 | 0.0151 | 0.551 | 0.192 |
| GO:0007154:cell_communication                                  | 2634 | 3667 | 4325 | 0.217105 | 0.0062 | 0.501 | 0.179 |
| GO:0019904:protein_domain_specific_binding                     | 324  | 504  | 597  | 0.217243 | 0.0151 | 0.495 | 0.164 |
| GO:0048519:negative_regulation_of_biological_process           | 1705 | 2196 | 2655 | 0.217574 | 0.0089 | 0.469 | 0.186 |
| GO:0044463:cell_projection_part                                | 391  | 799  | 836  | 0.217609 | 0.0134 | 0.637 | 0.185 |
| GO:0048583:regulation_of_response_to_stimulus                  | 1288 | 1858 | 2220 | 0.21818  | 0.0087 | 0.486 | 0.195 |
| GO:0046483:heterocycle_metabolic_process                       | 484  | 655  | 714  | 0.218251 | 0.0157 | 0.568 | 0.191 |
| GO:0007165:signal_transduction                                 | 2245 | 3141 | 3689 | 0.218292 | 0.0067 | 0.5   | 0.177 |
| GO:0043412:macromolecule_modification                          | 1187 | 1611 | 1882 | 0.218371 | 0.0092 | 0.486 | 0.184 |
| GO:0023052:signaling                                           | 2530 | 3537 | 4163 | 0.218855 | 0.0064 | 0.496 | 0.182 |
| GO:0043234:protein_complex                                     | 2051 | 2948 | 3312 | 0.218863 | 0.0084 | 0.525 | 0.186 |
| GO:0071310:cellular_response_to_organic_substance              | 543  | 687  | 815  | 0.218995 | 0.014  | 0.473 | 0.229 |
| GO:0008283:cell_proliferation                                  | 321  | 495  | 551  | 0.219151 | 0.0182 | 0.597 | 0.148 |
| GO:0032553:ribonucleotide_binding                              | 1433 | 2560 | 2758 | 0.219178 | 0.0079 | 0.589 | 0.173 |

## Sheet1

|                                                               |      |      |      |          |        |       |       |
|---------------------------------------------------------------|------|------|------|----------|--------|-------|-------|
| GO:0032555:purine_ribonucleotide_binding                      | 1432 | 2559 | 2757 | 0.219185 | 0.0079 | 0.589 | 0.173 |
| GO:0017076:purine_nucleotide_binding                          | 1441 | 2566 | 2763 | 0.219372 | 0.0079 | 0.589 | 0.173 |
| GO:0005524:ATP_binding                                        | 1145 | 2254 | 2399 | 0.219975 | 0.0087 | 0.598 | 0.175 |
| GO:0005215:transporter_activity                               | 912  | 1497 | 1739 | 0.220082 | 0.0094 | 0.554 | 0.173 |
| GO:0051128:regulation_of_cellular_component_organization      | 662  | 967  | 1088 | 0.22018  | 0.0132 | 0.522 | 0.191 |
| GO:0031410:cytoplasmic_vesicle                                | 531  | 841  | 951  | 0.220713 | 0.0148 | 0.552 | 0.192 |
| GO:0051649:establishment_of_localization_in_cell              | 718  | 1057 | 1142 | 0.220887 | 0.0119 | 0.554 | 0.161 |
| GO:0010628:positive_regulation_of_gene_expression             | 604  | 677  | 856  | 0.22089  | 0.0155 | 0.432 | 0.173 |
| GO:0035639:purine_ribonucleoside_triphosphate_binding         | 1409 | 2514 | 2712 | 0.220916 | 0.008  | 0.584 | 0.175 |
| GO:0051726:regulation_of_cell_cycle                           | 453  | 608  | 673  | 0.221173 | 0.0188 | 0.5   | 0.179 |
| GO:0031967:organelle_envelope                                 | 496  | 611  | 695  | 0.221443 | 0.0179 | 0.484 | 0.185 |
| GO:0071841:cellular_component_organization_or_biogenesis_at   | 1826 | 2817 | 3153 | 0.22161  | 0.0071 | 0.526 | 0.186 |
| GO:0010033:response_to_organic_substance                      | 996  | 1332 | 1528 | 0.222207 | 0.0104 | 0.514 | 0.201 |
| GO:0071840:cellular_component_organization_or_biogenesis      | 2249 | 3522 | 3972 | 0.222241 | 0.0067 | 0.525 | 0.19  |
| GO:0048731:system_development                                 | 2046 | 3090 | 3614 | 0.222675 | 0.0067 | 0.498 | 0.205 |
| GO:0016192:vesicle-mediated_transport                         | 484  | 782  | 860  | 0.222896 | 0.0135 | 0.579 | 0.183 |
| GO:0031988:membrane-bounded_vesicle                           | 509  | 812  | 922  | 0.223037 | 0.0149 | 0.549 | 0.196 |
| GO:0031982:vesicle                                            | 554  | 890  | 996  | 0.224303 | 0.0142 | 0.563 | 0.192 |
| GO:0030154:cell_differentiation                               | 1457 | 2117 | 2537 | 0.224457 | 0.0073 | 0.475 | 0.211 |
| GO:0042623:ATPase_activity,_coupled                           | 221  | 501  | 526  | 0.224688 | 0.0205 | 0.573 | 0.192 |
| GO:0032991:macromolecular_complex                             | 2450 | 3393 | 3738 | 0.224789 | 0.0078 | 0.537 | 0.19  |
| GO:0051179:localization                                       | 2410 | 3777 | 4179 | 0.224922 | 0.0069 | 0.555 | 0.185 |
| GO:0010467:gene_expression                                    | 906  | 1018 | 1114 | 0.225655 | 0.0129 | 0.575 | 0.173 |
| GO:0051239:regulation_of_multicellular_organismal_process     | 1025 | 1334 | 1616 | 0.225808 | 0.0101 | 0.462 | 0.211 |
| GO:0000166:nucleotide_binding                                 | 1822 | 3033 | 3227 | 0.226313 | 0.0083 | 0.582 | 0.18  |
| GO:0070887:cellular_response_to_chemical_stimulus             | 782  | 1004 | 1134 | 0.227288 | 0.0121 | 0.535 | 0.214 |
| GO:0055085:transmembrane_transport                            | 527  | 879  | 1033 | 0.227346 | 0.0132 | 0.527 | 0.195 |
| GO:0008104:protein_localization                               | 715  | 1088 | 1174 | 0.227617 | 0.0128 | 0.535 | 0.185 |
| GO:0016740:transferase_activity                               | 1386 | 2043 | 2261 | 0.227651 | 0.009  | 0.541 | 0.194 |
| GO:0003700:sequence-specific_DNA_binding_transcription_factc  | 665  | 584  | 739  | 0.228105 | 0.0173 | 0.452 | 0.169 |
| GO:0001071:nucleic_acid_binding_transcription_factor_activity | 667  | 585  | 741  | 0.228318 | 0.0172 | 0.452 | 0.168 |
| GO:0051716:cellular_response_to_stimulus                      | 2814 | 4085 | 4502 | 0.229533 | 0.0064 | 0.539 | 0.191 |
| GO:0009611:response_to_wounding                               | 623  | 922  | 1075 | 0.23078  | 0.0123 | 0.5   | 0.197 |
| GO:0051234:establishment_of_localization                      | 2011 | 3049 | 3399 | 0.23107  | 0.0076 | 0.539 | 0.192 |
| GO:0046983:protein_dimerization_activity                      | 476  | 621  | 665  | 0.231154 | 0.0186 | 0.582 | 0.185 |
| GO:0005794:Golgi_apparatus                                    | 690  | 914  | 1054 | 0.231344 | 0.0119 | 0.471 | 0.215 |
| GO:0019538:protein_metabolic_process                          | 1950 | 2700 | 2978 | 0.231454 | 0.0077 | 0.531 | 0.201 |
| GO:0006810:transport                                          | 1981 | 2985 | 3339 | 0.231589 | 0.0076 | 0.537 | 0.193 |
| GO:0031981:nuclear_lumen                                      | 1488 | 1974 | 2157 | 0.232298 | 0.0092 | 0.547 | 0.198 |
| GO:0042221:response_to_chemical_stimulus                      | 1689 | 2394 | 2696 | 0.232877 | 0.0087 | 0.531 | 0.206 |
| GO:0044428:nuclear_part                                       | 1682 | 2230 | 2439 | 0.232908 | 0.0088 | 0.538 | 0.196 |
| GO:0003008:system_process                                     | 983  | 1520 | 1731 | 0.233115 | 0.0107 | 0.52  | 0.221 |
| GO:0012505:endomembrane_system                                | 1038 | 1410 | 1562 | 0.233675 | 0.0113 | 0.523 | 0.213 |
| GO:0009059:macromolecule_biosynthetic_process                 | 857  | 1131 | 1119 | 0.233921 | 0.0146 | 0.638 | 0.177 |
| GO:0048584:positive_regulation_of_response_to_stimulus        | 568  | 760  | 893  | 0.234049 | 0.015  | 0.466 | 0.238 |
| GO:0007275:multicellular_organismal_development               | 2438 | 3758 | 4242 | 0.23469  | 0.0067 | 0.509 | 0.214 |
| GO:0042802:identical_protein_binding                          | 480  | 598  | 681  | 0.23482  | 0.0185 | 0.529 | 0.191 |
| GO:0048513:organ_development                                  | 1445 | 2145 | 2453 | 0.234858 | 0.009  | 0.501 | 0.216 |
| GO:0051171:regulation_of_nitrogen_compound_metabolic_proce    | 2191 | 2625 | 3026 | 0.235373 | 0.0081 | 0.477 | 0.201 |

## Sheet1

|                                                               |      |       |       |          |        |       |       |
|---------------------------------------------------------------|------|-------|-------|----------|--------|-------|-------|
| GO:0009653:anatomical_structure_morphogenesis                 | 1120 | 1728  | 2039  | 0.235593 | 0.0097 | 0.468 | 0.209 |
| GO:0048869:cellular_developmental_process                     | 1503 | 2262  | 2624  | 0.235675 | 0.0075 | 0.488 | 0.221 |
| GO:0048856:anatomical_structure_development                   | 2263 | 3473  | 3946  | 0.235684 | 0.0067 | 0.498 | 0.219 |
| GO:0005730:nucleolus                                          | 748  | 1047  | 1118  | 0.236454 | 0.0124 | 0.567 | 0.194 |
| GO:0009790:embryo_development                                 | 530  | 714   | 808   | 0.236583 | 0.0173 | 0.49  | 0.189 |
| GO:0044260:cellular_macromolecule_metabolic_process           | 2621 | 3657  | 3792  | 0.236643 | 0.0075 | 0.571 | 0.199 |
| GO:0031323:regulation_of_cellular_metabolic_process           | 2703 | 3252  | 3741  | 0.23721  | 0.0074 | 0.475 | 0.203 |
| GO:0022607:cellular_component_assembly                        | 729  | 1138  | 1268  | 0.237565 | 0.0133 | 0.51  | 0.199 |
| GO:0031090:organelle_membrane                                 | 1387 | 1767  | 1934  | 0.237624 | 0.0109 | 0.531 | 0.202 |
| GO:0045184:establishment_of_protein_localization              | 566  | 811   | 874   | 0.23803  | 0.0154 | 0.516 | 0.193 |
| GO:0033036:macromolecule_localization                         | 859  | 1415  | 1439  | 0.238077 | 0.0115 | 0.592 | 0.195 |
| GO:0034645:cellular_macromolecule_biosynthetic_process        | 840  | 1107  | 1087  | 0.238483 | 0.015  | 0.636 | 0.182 |
| GO:0050794:regulation_of_cellular_process                     | 4960 | 6866  | 7585  | 0.238704 | 0.0054 | 0.519 | 0.199 |
| GO:0080090:regulation_of_primary_metabolic_process            | 2680 | 3295  | 3752  | 0.239051 | 0.0073 | 0.483 | 0.203 |
| GO:0019219:regulation_of_nucleobase-containing_compound_m     | 2141 | 2584  | 2951  | 0.239358 | 0.0083 | 0.482 | 0.204 |
| GO:0060255:regulation_of_macromolecule_metabolic_process      | 2562 | 3114  | 3560  | 0.23973  | 0.0078 | 0.481 | 0.204 |
| GO:0065007:biological_regulation                              | 5554 | 7945  | 8623  | 0.239733 | 0.0052 | 0.532 | 0.203 |
| GO:0007155:cell_adhesion                                      | 464  | 1100  | 1213  | 0.240373 | 0.0123 | 0.545 | 0.222 |
| GO:0022610:biological_adhesion                                | 464  | 1100  | 1213  | 0.240373 | 0.0123 | 0.545 | 0.222 |
| GO:0009628:response_to_abiotic_stimulus                       | 370  | 609   | 625   | 0.240543 | 0.0174 | 0.624 | 0.21  |
| GO:0005515:protein_binding                                    | 4128 | 6043  | 6474  | 0.240993 | 0.0056 | 0.544 | 0.206 |
| GO:0015031:protein_transport                                  | 557  | 793   | 847   | 0.241062 | 0.0156 | 0.523 | 0.197 |
| GO:0044429:mitochondrial_part                                 | 453  | 546   | 542   | 0.241774 | 0.0195 | 0.615 | 0.177 |
| GO:0005634:nucleus                                            | 3650 | 4751  | 5028  | 0.241798 | 0.0066 | 0.552 | 0.198 |
| GO:0005102:receptor_binding                                   | 739  | 979   | 1022  | 0.241871 | 0.014  | 0.572 | 0.218 |
| GO:0070013:intracellular_organelle_lumen                      | 1734 | 2356  | 2498  | 0.242056 | 0.0096 | 0.564 | 0.202 |
| GO:0050789:regulation_of_biological_process                   | 5255 | 7414  | 8072  | 0.242179 | 0.0054 | 0.525 | 0.203 |
| GO:0050877:neurological_system_process                        | 755  | 1149  | 1296  | 0.242368 | 0.012  | 0.515 | 0.239 |
| GO:0032501:multicellular_organismal_process                   | 3362 | 5273  | 5854  | 0.242856 | 0.0061 | 0.517 | 0.221 |
| GO:0009889:regulation_of_biosynthetic_process                 | 2125 | 2567  | 2914  | 0.243318 | 0.0089 | 0.479 | 0.212 |
| GO:0006508:proteolysis                                        | 588  | 920   | 951   | 0.243395 | 0.0148 | 0.589 | 0.206 |
| GO:0032502:developmental_process                              | 2662 | 4097  | 4565  | 0.243491 | 0.0066 | 0.505 | 0.226 |
| GO:0031974:membrane-enclosed_lumen                            | 1784 | 2449  | 2584  | 0.243969 | 0.0096 | 0.564 | 0.206 |
| GO:0006139:nucleobase-containing_compound_metabolic_proce     | 1616 | 2225  | 2224  | 0.2442   | 0.0104 | 0.607 | 0.198 |
| GO:0044459:plasma_membrane_part                               | 1296 | 2358  | 2625  | 0.244269 | 0.0086 | 0.53  | 0.219 |
| GO:0031326:regulation_of_cellular_biosynthetic_process        | 2109 | 2539  | 2884  | 0.244398 | 0.0091 | 0.476 | 0.214 |
| GO:0043233:organelle_lumen                                    | 1757 | 2427  | 2561  | 0.244423 | 0.0096 | 0.565 | 0.206 |
| GO:0019222:regulation_of_metabolic_process                    | 2965 | 3718  | 4160  | 0.244557 | 0.0071 | 0.491 | 0.207 |
| GO:0044444:cytoplasmic_part                                   | 4151 | 5736  | 6037  | 0.245252 | 0.0063 | 0.56  | 0.205 |
| GO:0010556:regulation_of_macromolecule_biosynthetic_process   | 1991 | 2390  | 2703  | 0.246205 | 0.0093 | 0.476 | 0.217 |
| GO:0044085:cellular_component_biogenesis                      | 816  | 1285  | 1391  | 0.24838  | 0.0124 | 0.518 | 0.204 |
| GO:0034641:cellular_nitrogen_compound_metabolic_process       | 1931 | 2677  | 2678  | 0.248763 | 0.0097 | 0.601 | 0.209 |
| GO:0043170:macromolecule_metabolic_process                    | 3074 | 4495  | 4572  | 0.248833 | 0.0072 | 0.582 | 0.211 |
| GO:2000112:regulation_of_cellular_macromolecule_biosynthetic_ | 1951 | 2336  | 2631  | 0.249026 | 0.0096 | 0.476 | 0.22  |
| GO:0044237:cellular_metabolic_process                         | 3947 | 5532  | 5717  | 0.249179 | 0.0065 | 0.564 | 0.214 |
| GO:0009987:cellular_process                                   | 7681 | 11623 | 12113 | 0.249603 | 0.0044 | 0.566 | 0.211 |
| GO:0009058:biosynthetic_process                               | 1455 | 1959  | 1977  | 0.250098 | 0.0113 | 0.59  | 0.213 |
| GO:0051252:regulation_of_RNA_metabolic_process                | 1872 | 2211  | 2491  | 0.250145 | 0.0093 | 0.478 | 0.222 |
| GO:2001141:regulation_of_RNA_biosynthetic_process             | 1835 | 2184  | 2461  | 0.250468 | 0.0096 | 0.476 | 0.223 |

## Sheet1

|                                                             |      |       |       |          |        |       |       |
|-------------------------------------------------------------|------|-------|-------|----------|--------|-------|-------|
| GO:0044446:intracellular_organelle_part                     | 3893 | 5466  | 5689  | 0.250566 | 0.0067 | 0.56  | 0.208 |
| GO:0016887:ATPase_activity                                  | 281  | 776   | 712   | 0.250663 | 0.0175 | 0.698 | 0.2   |
| GO:0010468:regulation_of_gene_expression                    | 2059 | 2467  | 2784  | 0.250936 | 0.0093 | 0.476 | 0.218 |
| GO:0044249:cellular_biosynthetic_process                    | 1385 | 1828  | 1854  | 0.251064 | 0.0117 | 0.58  | 0.217 |
| GO:0016817:hydrolase_activity_acting_on_acid_anhydrides     | 619  | 1325  | 1282  | 0.251066 | 0.0135 | 0.631 | 0.207 |
| GO:0016462:pyrophosphatase_activity                         | 613  | 1325  | 1279  | 0.251238 | 0.0135 | 0.634 | 0.207 |
| GO:0016818:hydrolase_activity_acting_on_acid_anhydrides_in  | 616  | 1325  | 1279  | 0.251238 | 0.0135 | 0.634 | 0.207 |
| GO:0005783:endoplasmic_reticulum                            | 716  | 1036  | 1004  | 0.251474 | 0.0134 | 0.662 | 0.189 |
| GO:0044248:cellular_catabolic_process                       | 785  | 1108  | 1160  | 0.25198  | 0.0141 | 0.529 | 0.236 |
| GO:0006355:regulation_of_transcription_DNA-dependent        | 1824 | 2183  | 2450  | 0.252119 | 0.0096 | 0.477 | 0.225 |
| GO:0043228:non-membrane-bounded_organelle                   | 2236 | 3592  | 3657  | 0.253155 | 0.008  | 0.572 | 0.216 |
| GO:0043232:intracellular_non-membrane-bounded_organelle     | 2236 | 3592  | 3657  | 0.253155 | 0.008  | 0.572 | 0.216 |
| GO:0016874:ligase_activity                                  | 334  | 511   | 538   | 0.253245 | 0.0205 | 0.54  | 0.228 |
| GO:0009887:organ_morphogenesis                              | 484  | 687   | 773   | 0.2533   | 0.0167 | 0.485 | 0.211 |
| GO:0044422:organelle_part                                   | 3948 | 5626  | 5828  | 0.253338 | 0.0068 | 0.563 | 0.212 |
| GO:0005856:cytoskeleton                                     | 1142 | 2143  | 2195  | 0.253416 | 0.0112 | 0.558 | 0.221 |
| GO:0006807:nitrogen_compound_metabolic_process              | 2017 | 2829  | 2806  | 0.253549 | 0.0096 | 0.607 | 0.217 |
| GO:0005737:cytoplasm                                        | 5695 | 8116  | 8373  | 0.254054 | 0.0055 | 0.565 | 0.21  |
| GO:0017111:nucleoside-triphosphatase_activity               | 589  | 1295  | 1246  | 0.254382 | 0.0137 | 0.627 | 0.213 |
| GO:0043231:intracellular_membrane-bounded_organelle         | 5940 | 8092  | 8225  | 0.255142 | 0.0056 | 0.575 | 0.212 |
| GO:0043227:membrane-bounded_organelle                       | 5945 | 8099  | 8234  | 0.255291 | 0.0056 | 0.575 | 0.212 |
| GO:0044238:primary_metabolic_process                        | 4098 | 6023  | 6096  | 0.255464 | 0.0068 | 0.579 | 0.221 |
| GO:0048646:anatomical_structure_formation_involved_in_morph | 393  | 626   | 695   | 0.257011 | 0.0189 | 0.506 | 0.228 |
| GO:0071844:cellular_component_assembly_at_cellular_level    | 528  | 874   | 893   | 0.257216 | 0.0159 | 0.554 | 0.219 |
| GO:0044424:intracellular_part                               | 7869 | 11080 | 11205 | 0.257478 | 0.0049 | 0.579 | 0.213 |
| GO:0005622:intracellular                                    | 8231 | 11661 | 11781 | 0.257763 | 0.0049 | 0.581 | 0.212 |
| GO:0043229:intracellular_organelle                          | 6692 | 9419  | 9502  | 0.257892 | 0.0055 | 0.577 | 0.215 |
| GO:0043226:organelle                                        | 6700 | 9432  | 9516  | 0.257978 | 0.0055 | 0.577 | 0.215 |
| GO:0002376:immune_system_process                            | 885  | 1169  | 1261  | 0.258273 | 0.0138 | 0.494 | 0.249 |
| GO:0008152:metabolic_process                                | 4604 | 6735  | 6780  | 0.259408 | 0.0063 | 0.579 | 0.224 |
| GO:0005975:carbohydrate_metabolic_process                   | 451  | 737   | 724   | 0.260228 | 0.0188 | 0.581 | 0.213 |
| GO:0005887:integral_to_plasma_membrane                      | 762  | 1341  | 1519  | 0.260415 | 0.0122 | 0.49  | 0.234 |
| GO:0031226:intrinsic_to_plasma_membrane                     | 788  | 1374  | 1549  | 0.260551 | 0.012  | 0.496 | 0.233 |
| GO:0090304:nucleic_acid_metabolic_process                   | 1234 | 1755  | 1647  | 0.260817 | 0.0128 | 0.645 | 0.216 |
| GO:0044281:small_molecule_metabolic_process                 | 1272 | 1944  | 1922  | 0.261145 | 0.0108 | 0.619 | 0.229 |
| GO:0009888:tissue_development                               | 672  | 1054  | 1174  | 0.261508 | 0.0127 | 0.474 | 0.261 |
| GO:0009056:catabolic_process                                | 962  | 1393  | 1404  | 0.261989 | 0.0134 | 0.558 | 0.251 |
| GO:0003723:RNA_binding                                      | 546  | 577   | 623   | 0.262546 | 0.0244 | 0.506 | 0.216 |
| GO:0046872:metal_ion_binding                                | 2833 | 4823  | 4742  | 0.26318  | 0.0065 | 0.61  | 0.223 |
| GO:0022414:reproductive_process                             | 741  | 1144  | 1098  | 0.26427  | 0.0141 | 0.623 | 0.217 |
| GO:0000278:mitotic_cell_cycle                               | 363  | 522   | 592   | 0.264822 | 0.0201 | 0.414 | 0.265 |
| GO:0071702:organic_substance_transport                      | 272  | 567   | 544   | 0.264906 | 0.0174 | 0.624 | 0.284 |
| GO:0000003:reproduction                                     | 744  | 1146  | 1104  | 0.265257 | 0.0141 | 0.616 | 0.218 |
| GO:0005488:binding                                          | 8391 | 12913 | 12759 | 0.266124 | 0.0046 | 0.594 | 0.225 |
| GO:0044432:endoplasmic_reticulum_part                       | 481  | 681   | 657   | 0.26626  | 0.0178 | 0.639 | 0.225 |
| GO:0043167:ion_binding                                      | 2876 | 4916  | 4809  | 0.266348 | 0.0065 | 0.611 | 0.225 |
| GO:0043169:cation_binding                                   | 2870 | 4910  | 4797  | 0.267127 | 0.0066 | 0.611 | 0.225 |
| GO:0042175:nuclear_outer_membrane-endoplasmic_reticulum_n   | 445  | 614   | 598   | 0.267346 | 0.0196 | 0.621 | 0.24  |
| GO:0005789:endoplasmic_reticulum_membrane                   | 431  | 597   | 579   | 0.267848 | 0.0199 | 0.631 | 0.235 |

## Sheet1

|                                                              |       |       |       |          |        |       |       |
|--------------------------------------------------------------|-------|-------|-------|----------|--------|-------|-------|
| GO:0003824:catalytic_activity                                | 4151  | 6849  | 6751  | 0.268096 | 0.006  | 0.592 | 0.238 |
| GO:0005739:mitochondrion                                     | 980   | 1169  | 1117  | 0.268658 | 0.0155 | 0.613 | 0.21  |
| GO:0044430:cytoskeletal_part                                 | 835   | 1596  | 1605  | 0.269157 | 0.0133 | 0.562 | 0.236 |
| GO:0006066:alcohol_metabolic_process                         | 312   | 526   | 502   | 0.269607 | 0.0208 | 0.606 | 0.248 |
| GO:0003676:nucleic_acid_binding                              | 2365  | 3028  | 3001  | 0.269625 | 0.0097 | 0.575 | 0.224 |
| GO:0080134:regulation_of_response_to_stress                  | 390   | 538   | 582   | 0.271493 | 0.0197 | 0.479 | 0.334 |
| GO:0003677:DNA_binding                                       | 1595  | 2062  | 2025  | 0.272903 | 0.0116 | 0.571 | 0.244 |
| GO:0007049:cell_cycle                                        | 670   | 1052  | 1066  | 0.273023 | 0.015  | 0.521 | 0.23  |
| GO:0009986:cell_surface                                      | 282   | 483   | 519   | 0.274604 | 0.0188 | 0.516 | 0.235 |
| GO:0006950:response_to_stress                                | 1611  | 2375  | 2401  | 0.27478  | 0.0108 | 0.547 | 0.266 |
| GO:0002682:regulation_of_immune_system_process               | 489   | 611   | 686   | 0.276352 | 0.0179 | 0.421 | 0.342 |
| GO:0007017:microtubule-based_process                         | 217   | 534   | 492   | 0.277274 | 0.0217 | 0.617 | 0.236 |
| GO:0008270:zinc_ion_binding                                  | 1489  | 2345  | 2202  | 0.27741  | 0.0101 | 0.63  | 0.225 |
| GO:0004175:endorpeptidase_activity                           | 303   | 522   | 527   | 0.278657 | 0.0193 | 0.582 | 0.262 |
| GO:0070011:peptidase_activity_acting_on_L-amino_acid_peptidi | 433   | 763   | 739   | 0.279801 | 0.0163 | 0.632 | 0.249 |
| GO:0055114:oxidation-reduction_process                       | 402   | 608   | 580   | 0.280096 | 0.0224 | 0.604 | 0.247 |
| GO:0008233:peptidase_activity                                | 457   | 800   | 762   | 0.280242 | 0.016  | 0.653 | 0.24  |
| GO:0006974:response_to_DNA_damage_stimulus                   | 332   | 538   | 482   | 0.280322 | 0.0236 | 0.636 | 0.301 |
| GO:0016491:oxidoreductase_activity                           | 554   | 826   | 741   | 0.280546 | 0.0168 | 0.66  | 0.246 |
| GO:0046914:transition_metal_ion_binding                      | 1708  | 2755  | 2551  | 0.281469 | 0.0092 | 0.647 | 0.232 |
| GO:0048609:multicellular_organismal_reproductive_process     | 391   | 662   | 604   | 0.28321  | 0.0202 | 0.637 | 0.26  |
| GO:0032504:multicellular_organism_reproduction               | 391   | 662   | 604   | 0.28321  | 0.0202 | 0.637 | 0.26  |
| GO:0022402:cell_cycle_process                                | 535   | 895   | 873   | 0.285577 | 0.0162 | 0.529 | 0.256 |
| GO:0005623:cell                                              | 10748 | 16357 | 15816 | 0.28687  | 0.0045 | 0.588 | 0.242 |
| GO:0044464:cell_part                                         | 10747 | 16356 | 15813 | 0.286958 | 0.0045 | 0.588 | 0.242 |
| GO:0033554:cellular_response_to_stress                       | 575   | 867   | 814   | 0.287918 | 0.0177 | 0.589 | 0.298 |
| GO:0009308:amine_metabolic_process                           | 390   | 576   | 577   | 0.289057 | 0.0233 | 0.55  | 0.332 |
| GO:0008150:biological_process                                | 10243 | 16043 | 15459 | 0.289405 | 0.0046 | 0.587 | 0.248 |
| GO:0016787:hydrolase_activity                                | 1810  | 3440  | 3201  | 0.290579 | 0.0089 | 0.621 | 0.263 |
| GO:0003674:molecular_function                                | 11210 | 17637 | 16817 | 0.292659 | 0.0044 | 0.594 | 0.252 |
| GO:0005575:cellular_component                                | 11522 | 17552 | 16688 | 0.293881 | 0.0046 | 0.596 | 0.252 |
| GO:0016020:membrane                                          | 5195  | 8539  | 8324  | 0.293983 | 0.0063 | 0.574 | 0.258 |
| GO:0022403:cell_cycle_phase                                  | 438   | 738   | 730   | 0.296054 | 0.0185 | 0.504 | 0.278 |
| GO:0005509:calcium_ion_binding                               | 492   | 1107  | 1021  | 0.296544 | 0.0155 | 0.612 | 0.254 |
| GO:0015630:microtubule_cytoskeleton                          | 528   | 1074  | 1005  | 0.296609 | 0.0171 | 0.57  | 0.25  |
| GO:0019953:sexual_reproduction                               | 352   | 675   | 598   | 0.298196 | 0.0198 | 0.682 | 0.25  |
| GO:0050896:response_to_stimulus                              | 4220  | 6821  | 6620  | 0.29923  | 0.007  | 0.563 | 0.263 |
| GO:0007276:gamete_generation                                 | 304   | 562   | 497   | 0.299358 | 0.0224 | 0.651 | 0.279 |
| GO:0006629:lipid_metabolic_process                           | 657   | 1064  | 985   | 0.301865 | 0.0168 | 0.62  | 0.292 |
| GO:0051704:multi-organism_process                            | 592   | 824   | 838   | 0.304038 | 0.0198 | 0.496 | 0.294 |
| GO:0005615:extracellular_space                               | 526   | 892   | 801   | 0.306037 | 0.0159 | 0.651 | 0.302 |
| GO:0031012:extracellular_matrix                              | 297   | 744   | 754   | 0.307854 | 0.018  | 0.532 | 0.319 |
| GO:0071944:cell_periphery                                    | 2714  | 5061  | 4943  | 0.308239 | 0.0084 | 0.563 | 0.283 |
| GO:0005886:plasma_membrane                                   | 2666  | 5006  | 4891  | 0.309227 | 0.0085 | 0.56  | 0.287 |
| GO:0005694:chromosome                                        | 364   | 572   | 548   | 0.311907 | 0.0235 | 0.565 | 0.259 |
| GO:0043436:oxoacid_metabolic_process                         | 515   | 814   | 746   | 0.313308 | 0.0201 | 0.631 | 0.338 |
| GO:0019752:carboxylic_acid_metabolic_process                 | 515   | 814   | 746   | 0.313308 | 0.0201 | 0.631 | 0.338 |
| GO:0044425:membrane_part                                     | 4128  | 7060  | 6614  | 0.313475 | 0.007  | 0.588 | 0.277 |
| GO:0006082:organic_acid_metabolic_process                    | 526   | 845   | 766   | 0.313711 | 0.0195 | 0.649 | 0.333 |



## Sheet1

|                                                      |      |      |      |          |        |       |       |
|------------------------------------------------------|------|------|------|----------|--------|-------|-------|
| GO:0006259:DNA_metabolic_process                     | 485  | 911  | 715  | 0.314683 | 0.0217 | 0.751 | 0.264 |
| GO:0042180:cellular_ketone_metabolic_process         | 528  | 833  | 760  | 0.316727 | 0.0206 | 0.627 | 0.339 |
| GO:0044421:extracellular_region_part                 | 725  | 1395 | 1298 | 0.319267 | 0.0133 | 0.593 | 0.342 |
| GO:0016788:hydrolase_activity_acting_on_ester_bonds  | 527  | 948  | 847  | 0.319903 | 0.0182 | 0.586 | 0.376 |
| GO:0005578:proteinaceous_extracellular_matrix        | 257  | 684  | 678  | 0.320989 | 0.0203 | 0.539 | 0.329 |
| GO:0005198:structural_molecule_activity              | 464  | 848  | 769  | 0.323    | 0.0205 | 0.592 | 0.307 |
| GO:0000279:M_phase                                   | 283  | 544  | 488  | 0.323493 | 0.0234 | 0.576 | 0.284 |
| GO:0030246:carbohydrate_binding                      | 272  | 534  | 495  | 0.327963 | 0.0256 | 0.553 | 0.289 |
| GO:0031224:intrinsic_to_membrane                     | 3569 | 6168 | 5655 | 0.332252 | 0.008  | 0.585 | 0.295 |
| GO:0016021:integral_to_membrane                      | 3497 | 6088 | 5558 | 0.334064 | 0.008  | 0.586 | 0.297 |
| GO:0007600:sensory_perception                        | 313  | 604  | 500  | 0.335213 | 0.0243 | 0.719 | 0.312 |
| GO:0044255:cellular_lipid_metabolic_process          | 475  | 714  | 679  | 0.339635 | 0.022  | 0.519 | 0.347 |
| GO:0005815:microtubule_organizing_center             | 277  | 542  | 484  | 0.34376  | 0.0249 | 0.5   | 0.399 |
| GO:0005576:extracellular_region                      | 1322 | 2281 | 1948 | 0.345448 | 0.0122 | 0.644 | 0.341 |
| GO:0006952:defense_response                          | 525  | 764  | 691  | 0.350595 | 0.0224 | 0.556 | 0.345 |
| GO:0006955:immune_response                           | 500  | 696  | 625  | 0.356863 | 0.0232 | 0.533 | 0.393 |
| GO:0004871:signal_transducer_activity                | 1170 | 2350 | 1994 | 0.400144 | 0.0161 | 0.586 | 0.369 |
| GO:0004872:receptor_activity                         | 1233 | 2710 | 2218 | 0.405647 | 0.0148 | 0.615 | 0.368 |
| GO:0038023:signaling_receptor_activity               | 913  | 2046 | 1583 | 0.455977 | 0.0191 | 0.624 | 0.43  |
| GO:0004888:transmembrane_signaling_receptor_activity | 844  | 1991 | 1489 | 0.465668 | 0.0198 | 0.654 | 0.437 |
| GO:0004930:G-protein_coupled_receptor_activity       | 604  | 1469 | 890  | 0.60268  | 0.0293 | 0.741 | 0.573 |
| GO:0004984:olfactory_receptor_activity               | 310  | 1024 | 430  | 0.895853 | 0.0478 | 1.011 | 0.993 |
